# Supplementary figures and images for: Immortalised breast epithelia survive prolonged DNA replication stress and return to cycle from a senescent-like state
Source: PubMed Central journal article supplement — Cell Death Dis. 2014 Jul 24;5(7):e1351–. doi: 10.1038/cddis.2014.315 (PMC4123104; doi:10.1038/cddis.2014.315), 2014-07-24

a

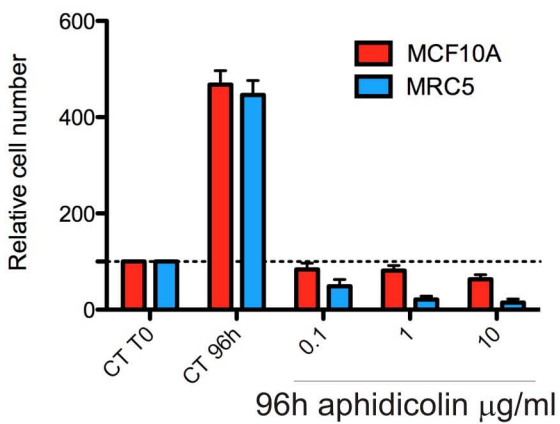

b

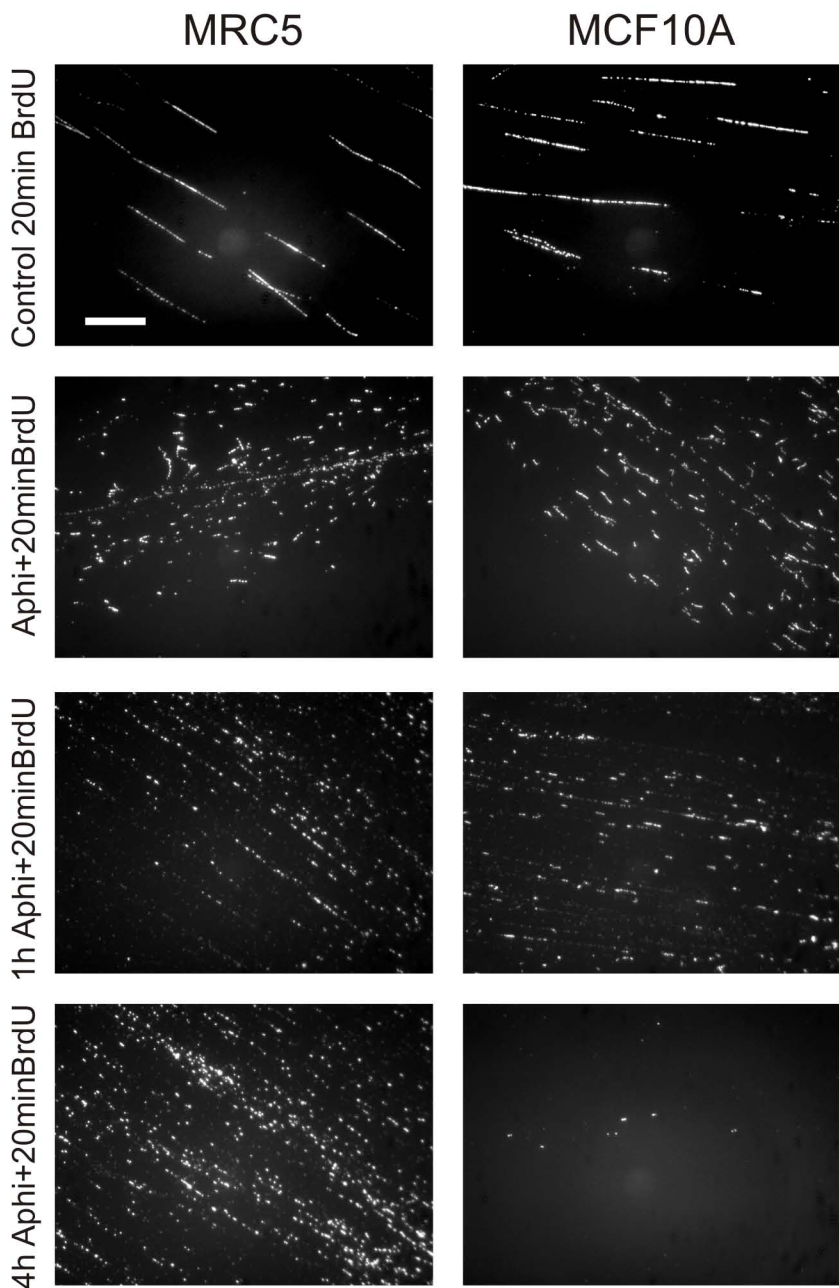

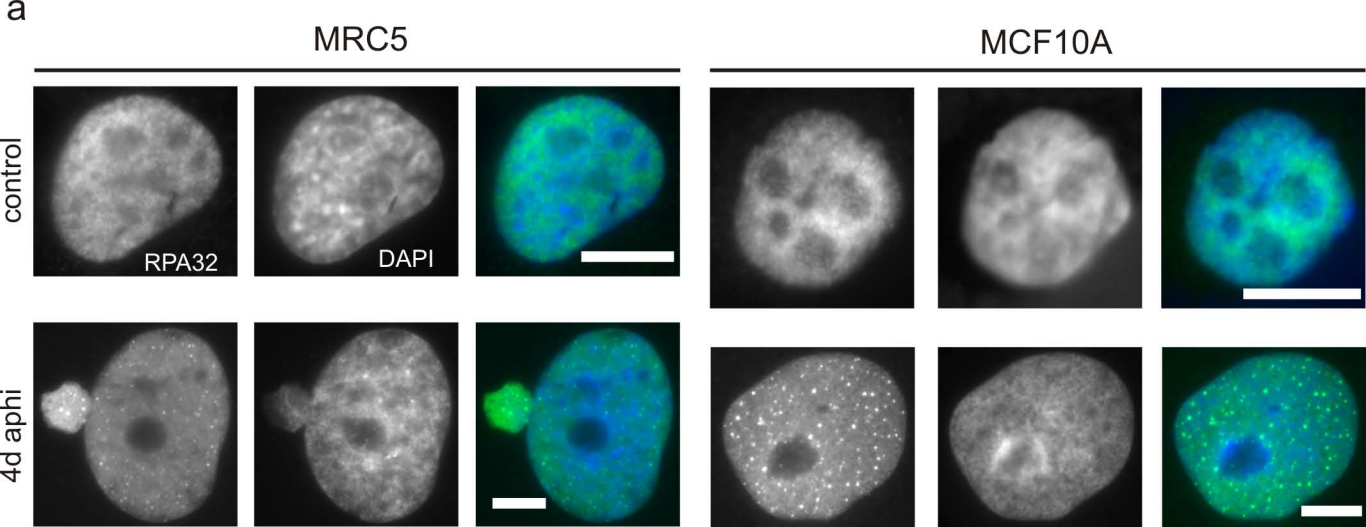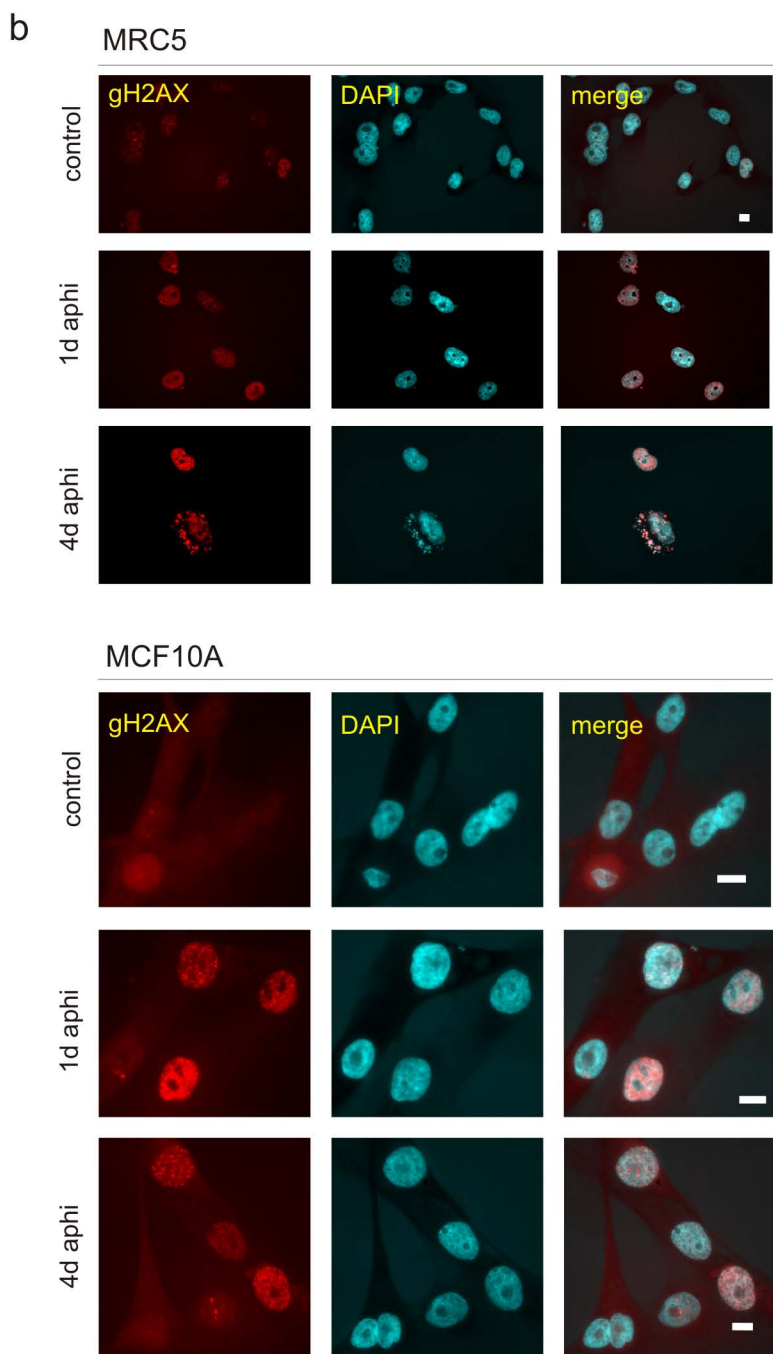

Fig S2.

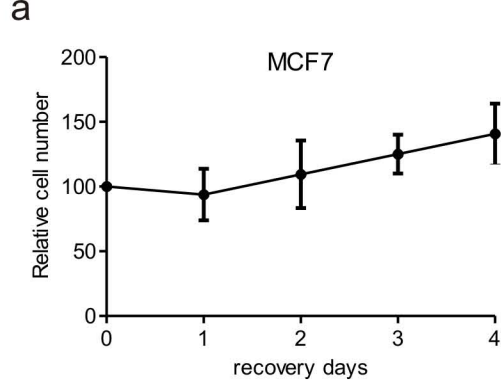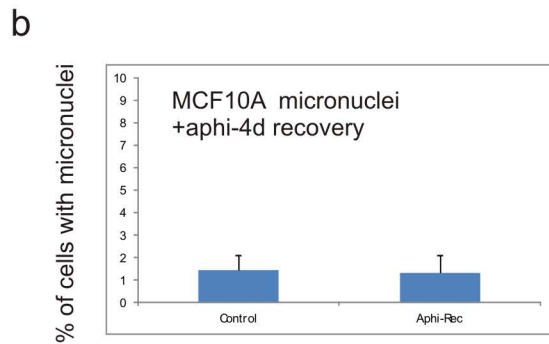

**c**

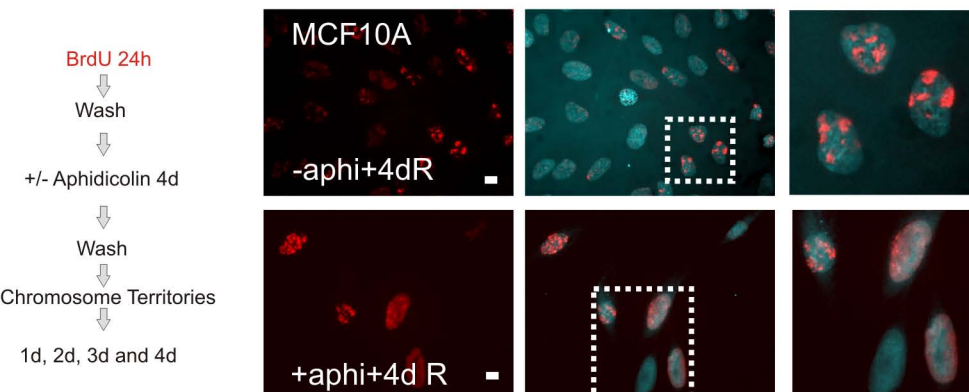

**d**

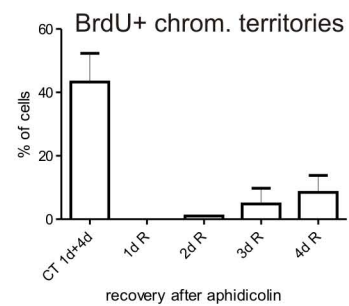

Fig S3.

a

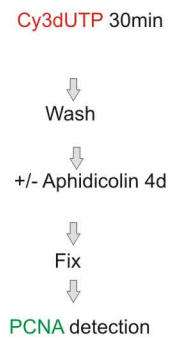

b

control

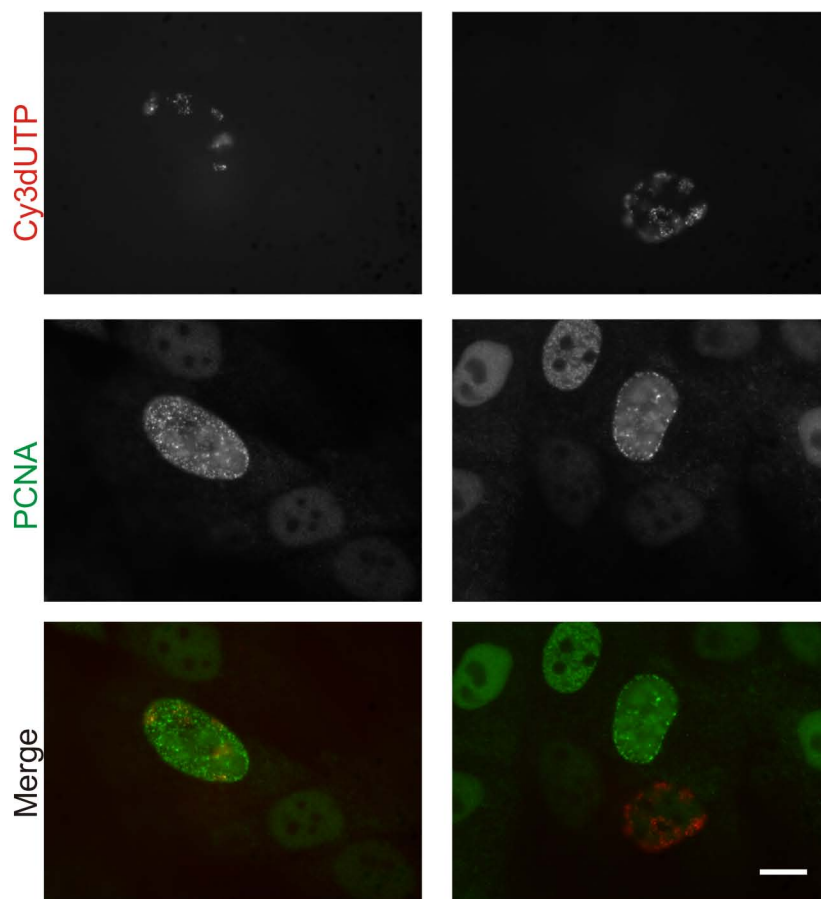

c

4d aphidicolin

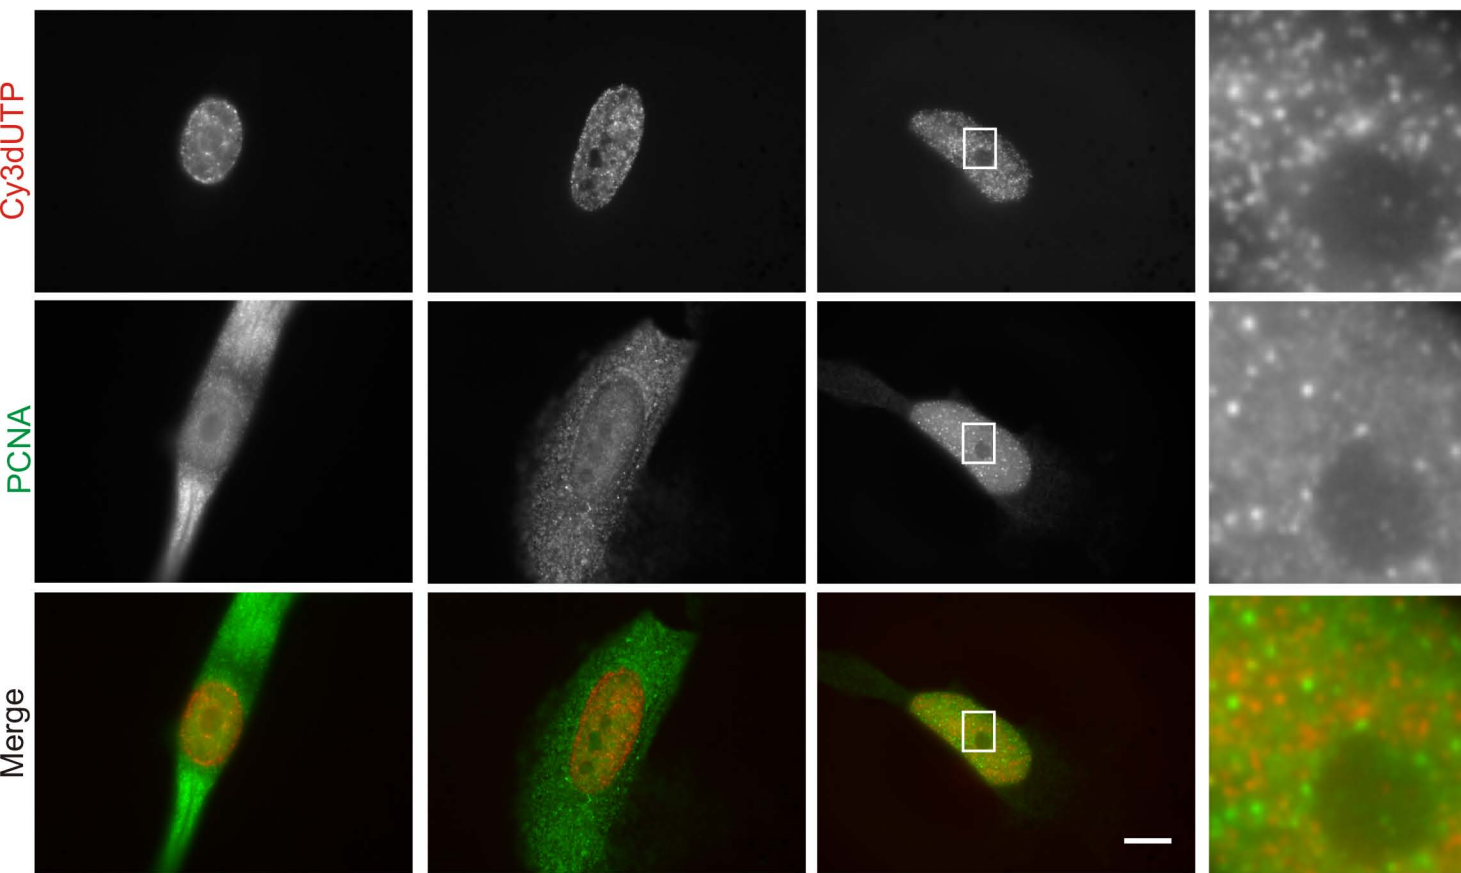

Fig S4.

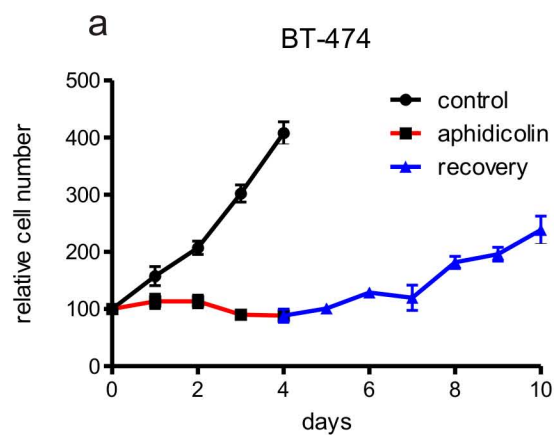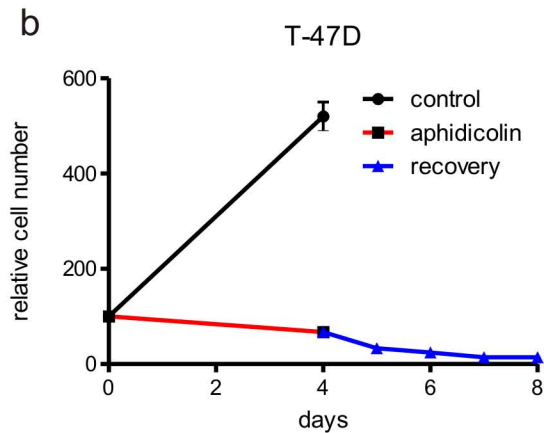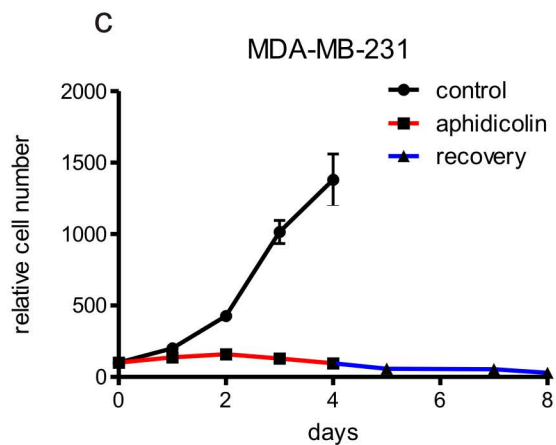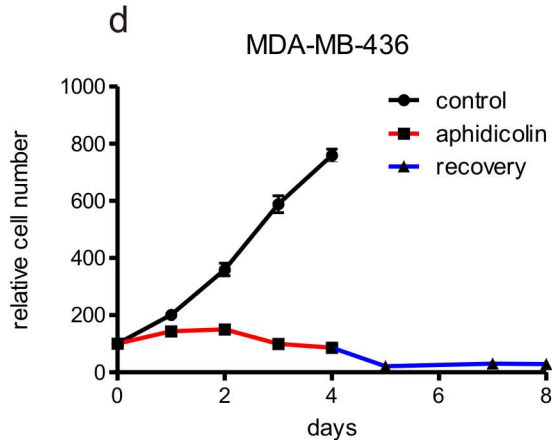

Fig S5.

a

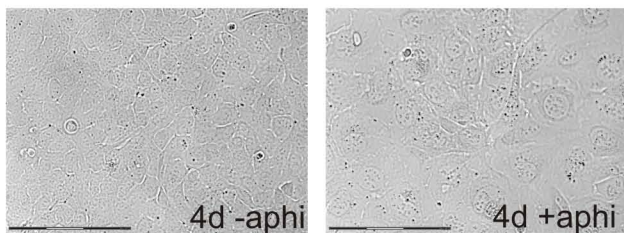

b

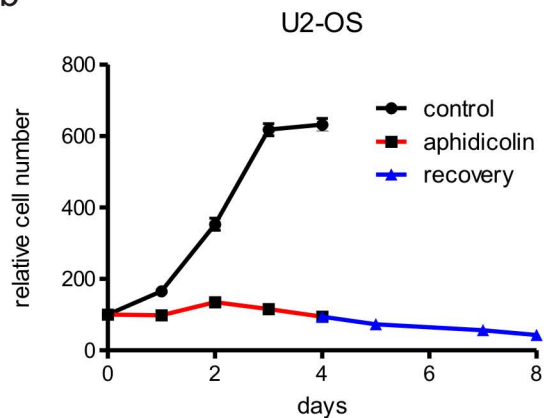

c

aphidicolin

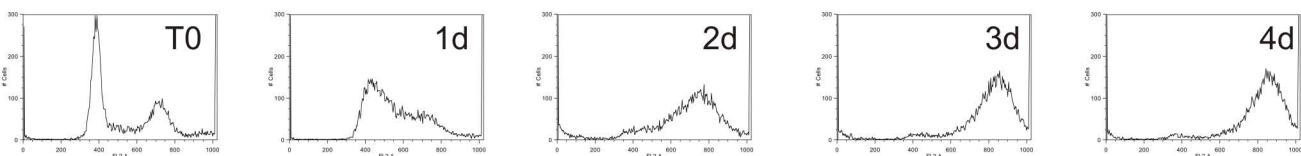

recovery

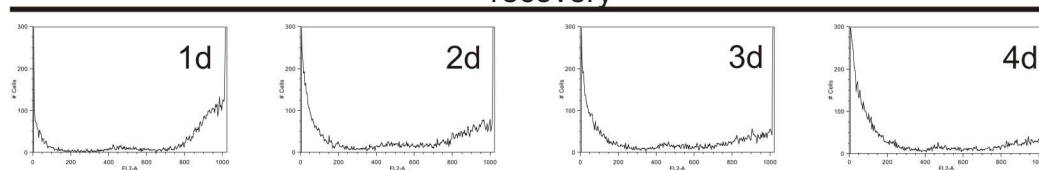

d

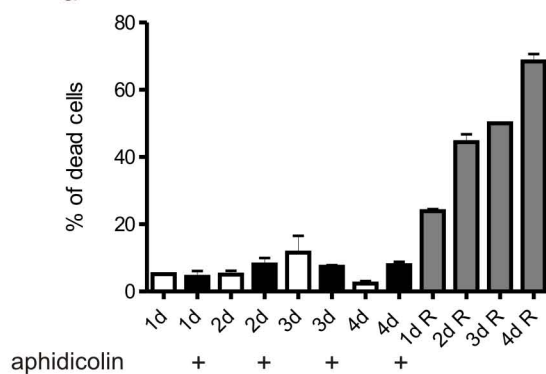

Fig S6.

Supplement: cddis2014315x1.pdf [file cddis2014315x1.pdf]
